# Supplementary material for: Combinations of Histone Deacetylase Inhibitors with Distinct Latency Reversing Agents Variably Affect HIV Reactivation and Susceptibility to NK Cell-Mediated Killing of T Cells That Exit Viral Latency
Source: MDPI journal article supplement (doi:10.3390/ijms22136654), 2021-06-22
Supplement: s1 [file s1]

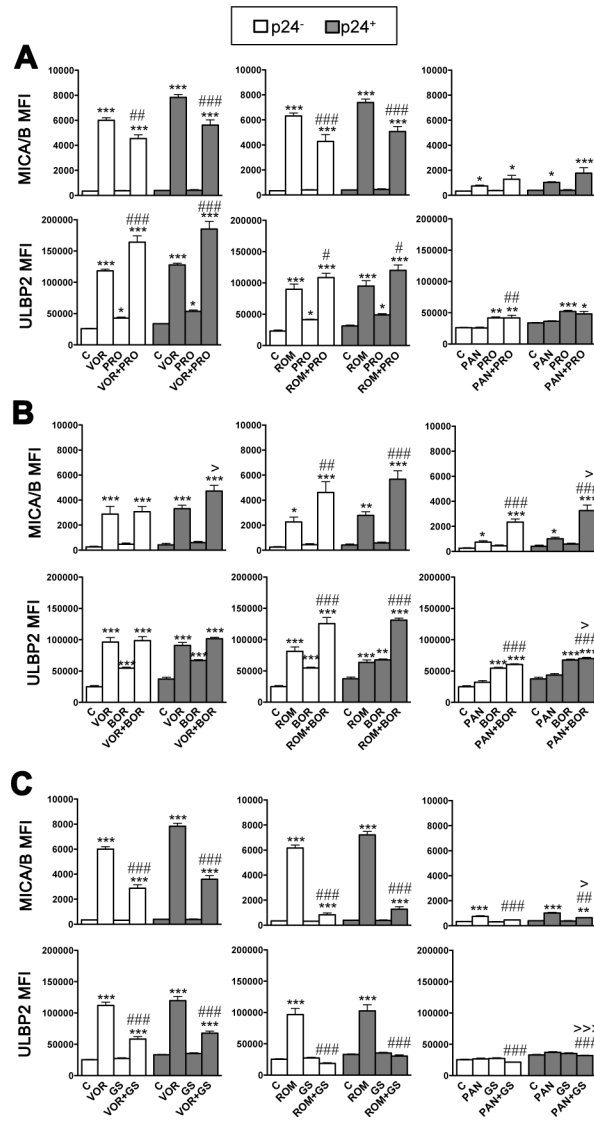

**Supplementary Fig. S1.** Modulation of NKG2DLs expression by single and two-drug combinations in J1.1 cells. J1.1 cells were treated for 48 h with solvent as control (CTR), 10  $\mu$ M VOR, 20 nM ROM, 20 nM PAN, 1  $\mu$ M PRO, 5 nM BOR, or 3  $\mu$ M GS-9620 (GS) used alone or combining each HDACi (VOR, ROM, PAN) with PRO, BOR, or GS. Mean fluorescence intensity (MFI) of MICA/B and ULBP2 expression (mean  $\pm$  SEM MFI) was quantified on both p24<sup>-</sup> and p24<sup>+</sup> cells after exposure to single or combined HDACi/PRO (A), HDACi/BOR (B), and HDACi/GS (C). Bars represent mean  $\pm$  SEM (n=7). Statistics was performed using One-way Anova with Bonferroni post test to perform multiple comparisons. Versus control (CTR): \* $P$  < 0.05, \*\* $P$  < 0.01, \*\*\* $P$  < 0.001. Versus HDACi alone: # $P$  < 0.05, ## $P$  < 0.01, ### $P$  < 0.001. Versus p24<sup>-</sup> cells: > $P$  < 0.05, >> $P$  < 0.001.
